# Supplementary material for: One-pot fabrication of multifunctional superparamagnetic attapulgite/Fe3O4/polyaniline nanocomposites served as an adsorbent and catalyst support
Source: Royal Society of Chemistry journal article supplement (doi:10.1039/c4ta05367b), 2014-11-04
Supplement: c4ta05367b1.pdf [file c4ta05367b1.pdf]

## Supporting Information

### **One-pot fabrication of multifunctional superparamagnetic attapulgite/Fe<sub>3</sub>O<sub>4</sub>/polyaniline nanocomposites served as adsorbent and catalyst support**

**Bin Mu, and Aiqin Wang\***

Center of Eco-materials and Green Chemistry, Lanzhou Institute of Chemical Physics,  
Chinese Academy of Sciences, Lanzhou 730000, China.

\*Corresponding author. Fax: 86 931 8277088; Tel: 86 931 4968118; E-mail:

[aqwang@licp.cas.cn](mailto:aqwang@licp.cas.cn)

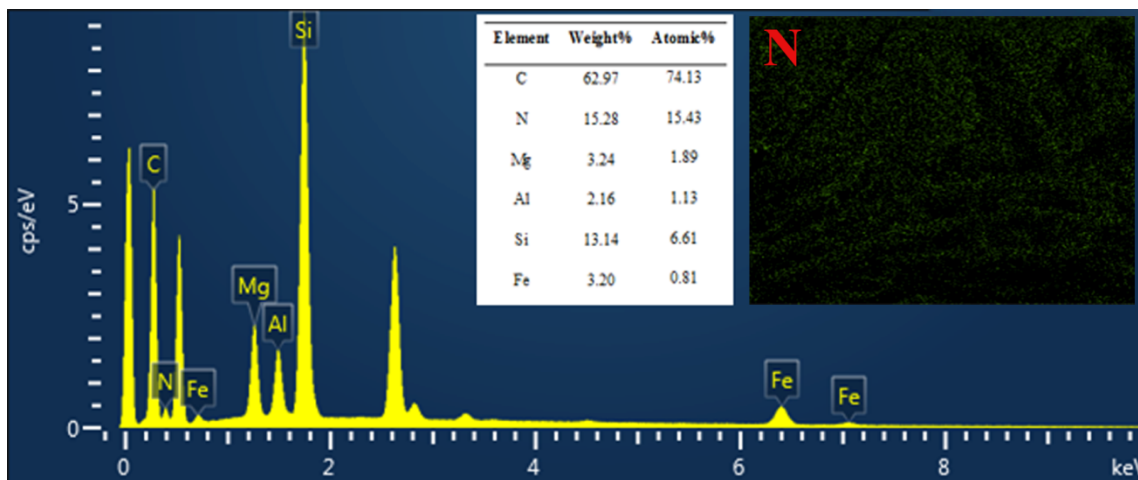

**Fig. S1.** EDX spectrum and N elemental mapping pattern of the as-prepared APT/PANI nanocomposites.

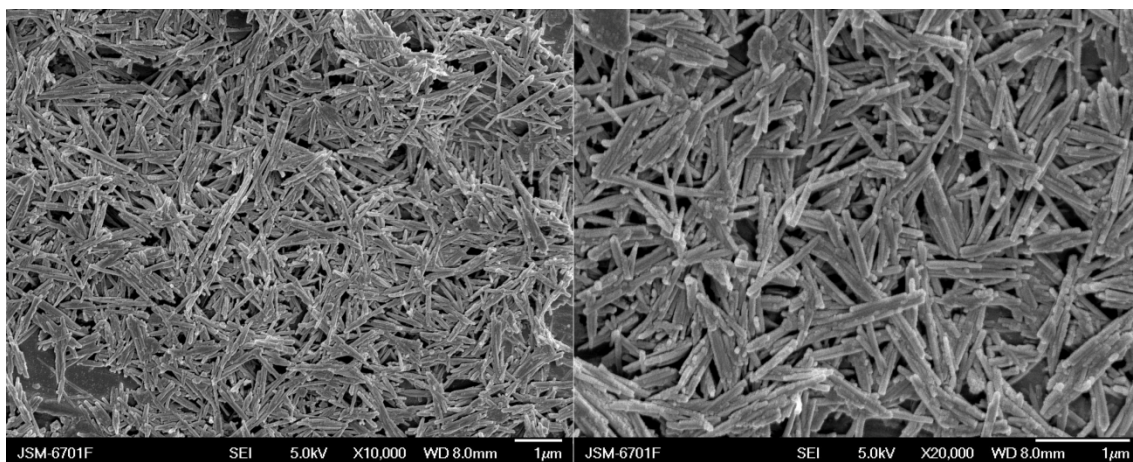

**Fig. S2** SEM images of APT.

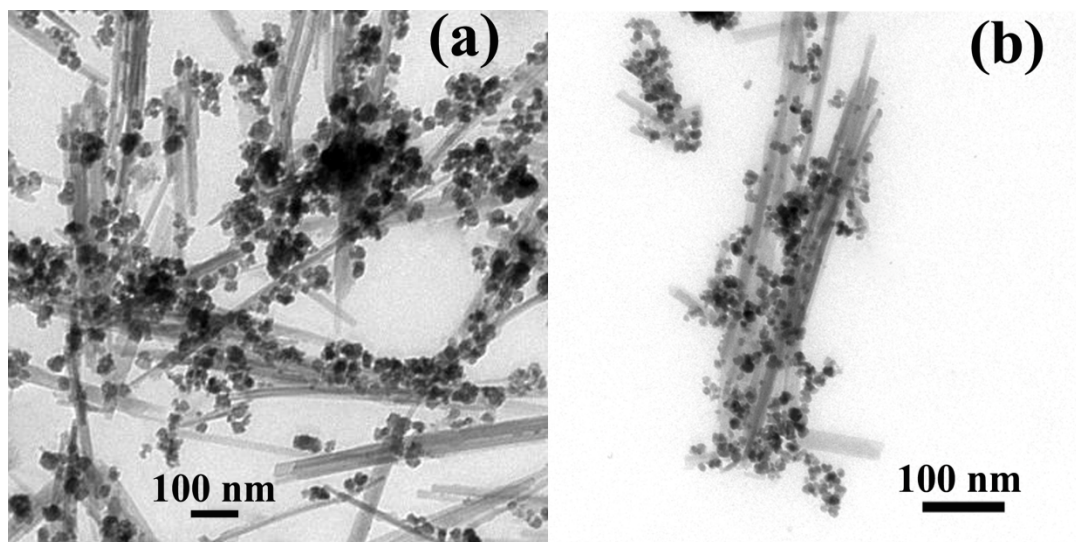

**Fig. S3** TEM images of APT/Fe<sub>3</sub>O<sub>4</sub>/PANI<sub>3</sub> and APT/Fe<sub>3</sub>O<sub>4</sub>/PANI<sub>4</sub>.

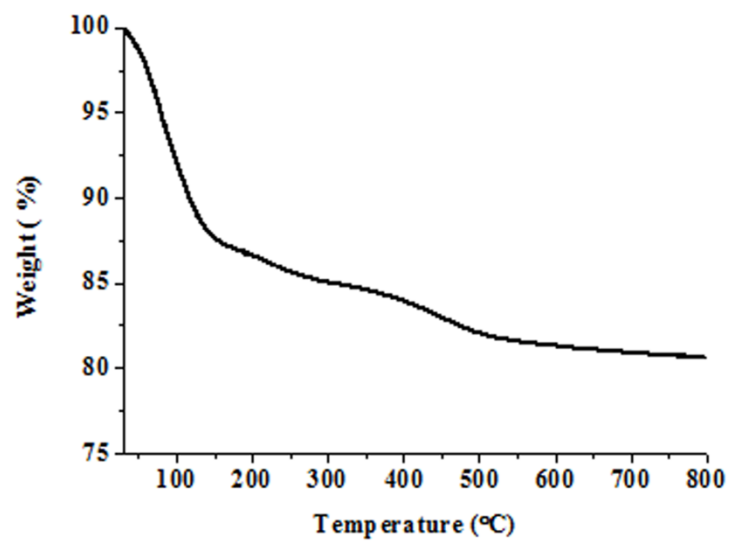

**Fig. S4** TGA curve of APT under oxygen atmosphere at a heating rate of 10 °C/min.
